# Supplementary material for: The Nero Lucano Pig Breed: Recovery and Variability
Source: MDPI journal article supplement (doi:10.3390/ani11051331), 2021-05-07
Supplement: s1 [file s1]

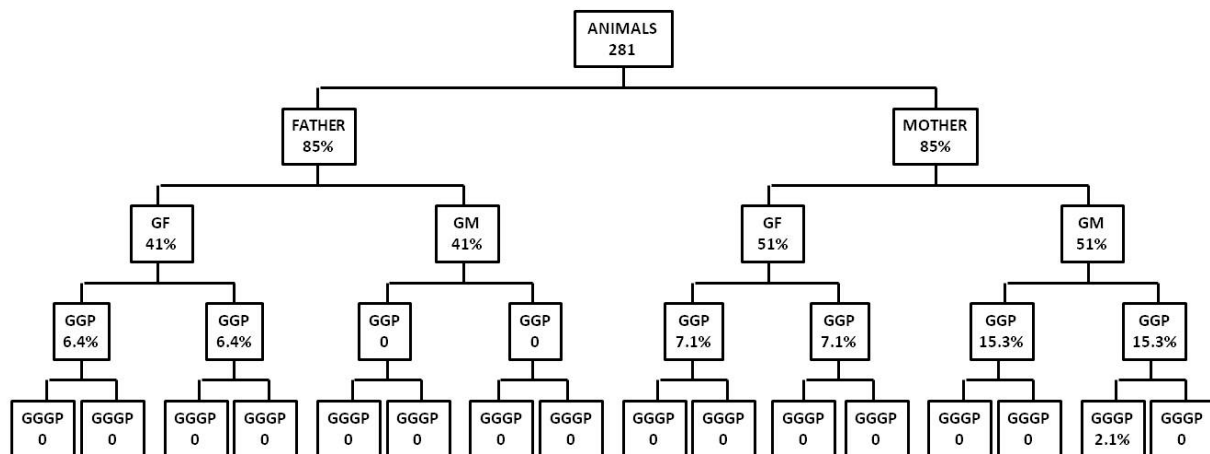

**Figure S1.** Pedigree completeness up to 4 generations back in Nero Lucano pig.

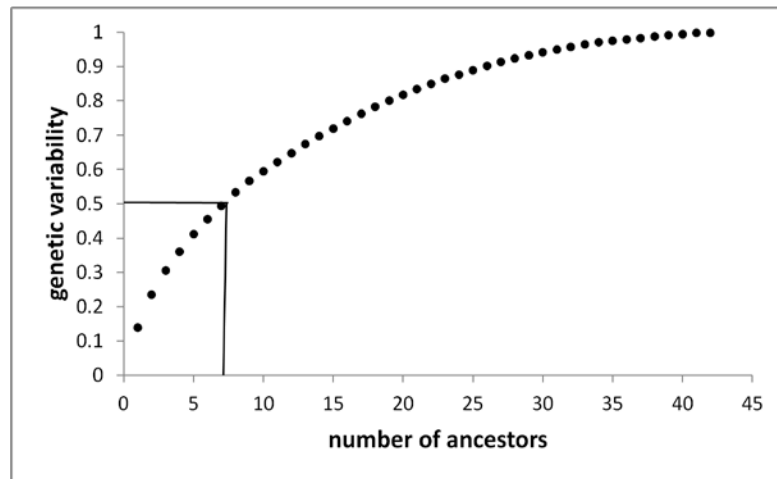

**Figure S2.** Effect of number of ancestors on genetic variability in Nero Lucano pig.

**Table S1.** distribution of SNPs per chromosome updated according to the Illumina PorcineSNP60 v2.0 Manifest File modified on 26/4/2019.

| <b>chromosome</b>       | <b>previous<br/>SNP number</b> | <b>updated<br/>SNP number</b> |
|-------------------------|--------------------------------|-------------------------------|
| 0                       | 7849                           | 1091                          |
| 1                       | 6512                           | 7183                          |
| 2                       | 3392                           | 3767                          |
| 3                       | 2805                           | 3263                          |
| 4                       | 3551                           | 3902                          |
| 5                       | 2361                           | 2740                          |
| 6                       | 3216                           | 4122                          |
| 7                       | 3348                           | 3610                          |
| 8                       | 2777                           | 3178                          |
| 9                       | 3213                           | 3528                          |
| 10                      | 1796                           | 1954                          |
| 11                      | 1890                           | 2151                          |
| 12                      | 1562                           | 1803                          |
| 13                      | 4090                           | 4604                          |
| 14                      | 3906                           | 4267                          |
| 15                      | 2906                           | 3303                          |
| 16                      | 1877                           | 2086                          |
| 17                      | 1720                           | 1916                          |
| 18                      | 1336                           | 1487                          |
| X                       | 1449                           | 1426                          |
| Y                       | 9                              | 58                            |
| XY $\psi$ -<br>autosome |                                | 126                           |
| total                   | 61565                          | 61565                         |

**Table S2.** Distribution of SNPs per chromosome and MAF classes in Nero Lucano pig.

| SSC          | MAF  |        |          | total |
|--------------|------|--------|----------|-------|
|              | 0    | 0-0.05 | 0.05-0.5 |       |
| 0            | 207  | 286    | 503      | 996   |
| 1            | 1292 | 2011   | 3810     | 7113  |
| 2            | 339  | 1582   | 1791     | 3712  |
| 3            | 378  | 812    | 2027     | 3217  |
| 4            | 486  | 1927   | 1451     | 3864  |
| 5            | 340  | 1268   | 1102     | 2710  |
| 6            | 460  | 1006   | 2607     | 4073  |
| 7            | 487  | 1138   | 1919     | 3544  |
| 8            | 401  | 1132   | 1619     | 3152  |
| 9            | 366  | 1231   | 1882     | 3479  |
| 10           | 203  | 800    | 930      | 1933  |
| 11           | 204  | 667    | 1242     | 2113  |
| 12           | 153  | 835    | 788      | 1776  |
| 13           | 611  | 1944   | 2003     | 4558  |
| 14           | 576  | 1474   | 2163     | 4213  |
| 15           | 434  | 1307   | 1513     | 3254  |
| 16           | 183  | 511    | 1364     | 2058  |
| 17           | 196  | 744    | 944      | 1884  |
| 18           | 196  | 555    | 719      | 1470  |
| 23           | 405  | 328    | 669      | 1402  |
| 24           | 17   | 0      | 0        | 17    |
| 25           | 10   | 41     | 71       | 122   |
| <b>total</b> |      |        |          | 60660 |

0= non-defined chromosome position

23=X chromosome

24=Y chromosome

25= XY @autosomal region

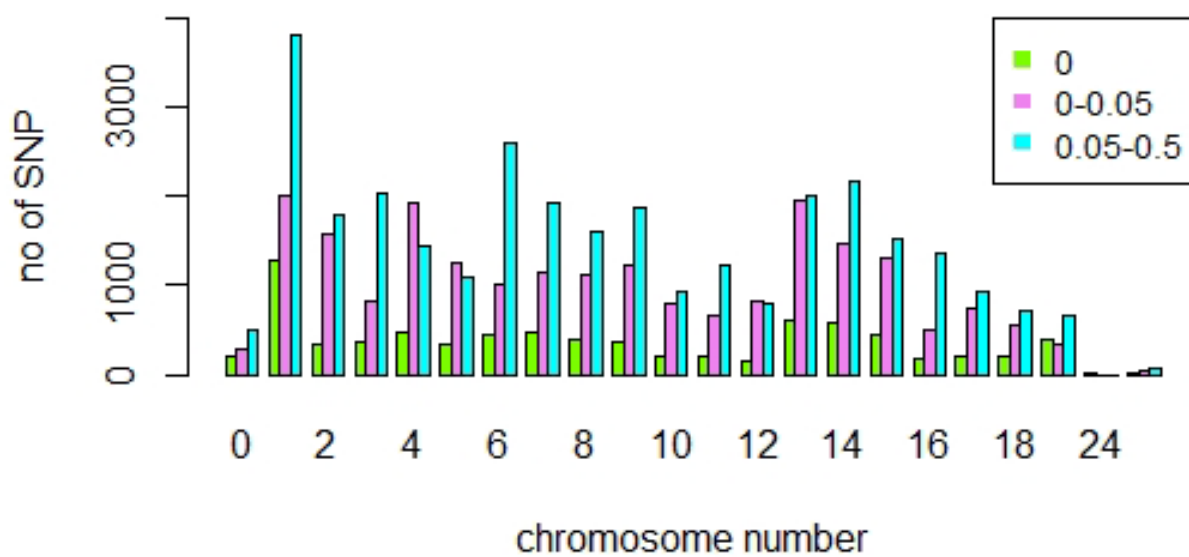

**Figure S3.** SNP distribution per chromosome and MAF classes in Nero Lucano pig. (0= non-defined chromosome position, 23=X chromosome, 24= Y chromosome, 25= XY  $\psi$ -autosomal region).

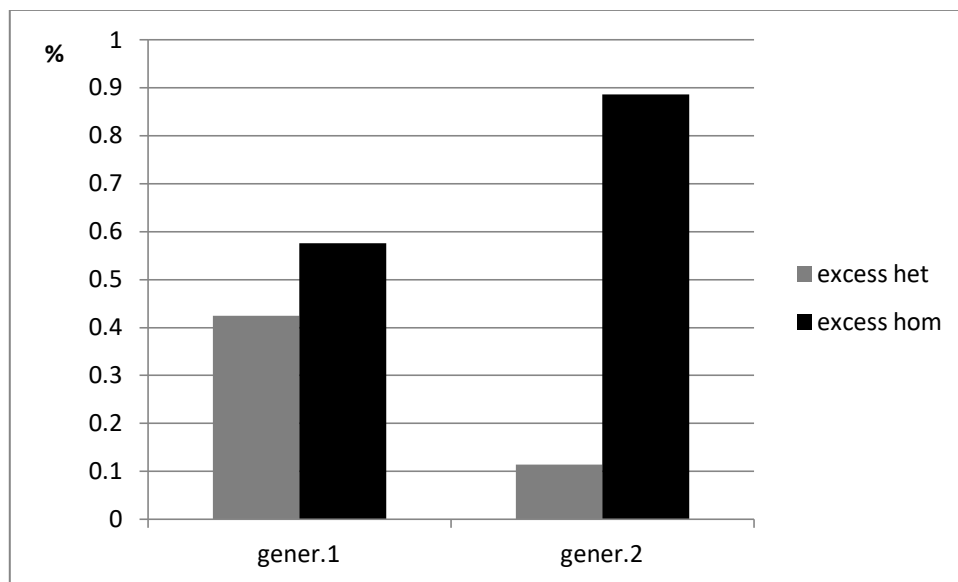

**Figure S4.** SNPs in Hardy-Weinberg disequilibrium due to excess of heterozygotes and homozygotes in generations 1 and 2 of the Nero Lucano pig pedigree.

**Table S3.** Distribution of the ROH per chromosome and ROH classes in Nero Lucano pig.

| SSC      | ROH class |       |       |        |       | Totale N. | % coverage |
|----------|-----------|-------|-------|--------|-------|-----------|------------|
|          | <2Mb      | 2-4Mb | 4-8Mb | 8-16Mb | >16Mb |           |            |
| 1        | 136       | 517   | 171   | 154    | 280   | 1258      | 29.41      |
| 2        | 118       | 279   | 202   | 175    | 154   | 928       | 36.38      |
| 3        | 48        | 162   | 189   | 163    | 132   | 694       | 24.69      |
| 4        | 41        | 159   | 98    | 52     | 246   | 596       | 51.2       |
| 5        | 3         | 114   | 106   | 152    | 244   | 619       | 49.67      |
| 6        | 79        | 106   | 149   | 163    | 165   | 662       | 28.01      |
| 7        | 44        | 197   | 171   | 178    | 199   | 789       | 42.7       |
| 8        | 19        | 138   | 146   | 153    | 180   | 636       | 36.39      |
| 9        | 49        | 135   | 184   | 172    | 209   | 749       | 40.17      |
| 10       | 16        | 54    | 249   | 107    | 158   | 584       | 45.77      |
| 11       | 10        | 154   | 150   | 84     | 89    | 487       | 27.95      |
| 12       | 35        | 121   | 138   | 149    | 93    | 536       | 39.1       |
| 13       | 50        | 69    | 99    | 130    | 204   | 552       | 45.18      |
| 14       | 61        | 595   | 163   | 129    | 170   | 1118      | 41.44      |
| 15       | 13        | 88    | 167   | 118    | 222   | 608       | 48.86      |
| 16       | 39        | 106   | 95    | 88     | 91    | 419       | 29.28      |
| 17       | 53        | 95    | 134   | 85     | 120   | 487       | 40.48      |
| 18       | 6         | 74    | 174   | 82     | 101   | 437       | 39.18      |
| N./class | 820       | 3163  | 2785  | 2334   | 3057  | 12159     | 38.16      |
| %/class  | 6.74      | 26.01 | 22.91 | 19.2   | 25.14 | 1         |            |

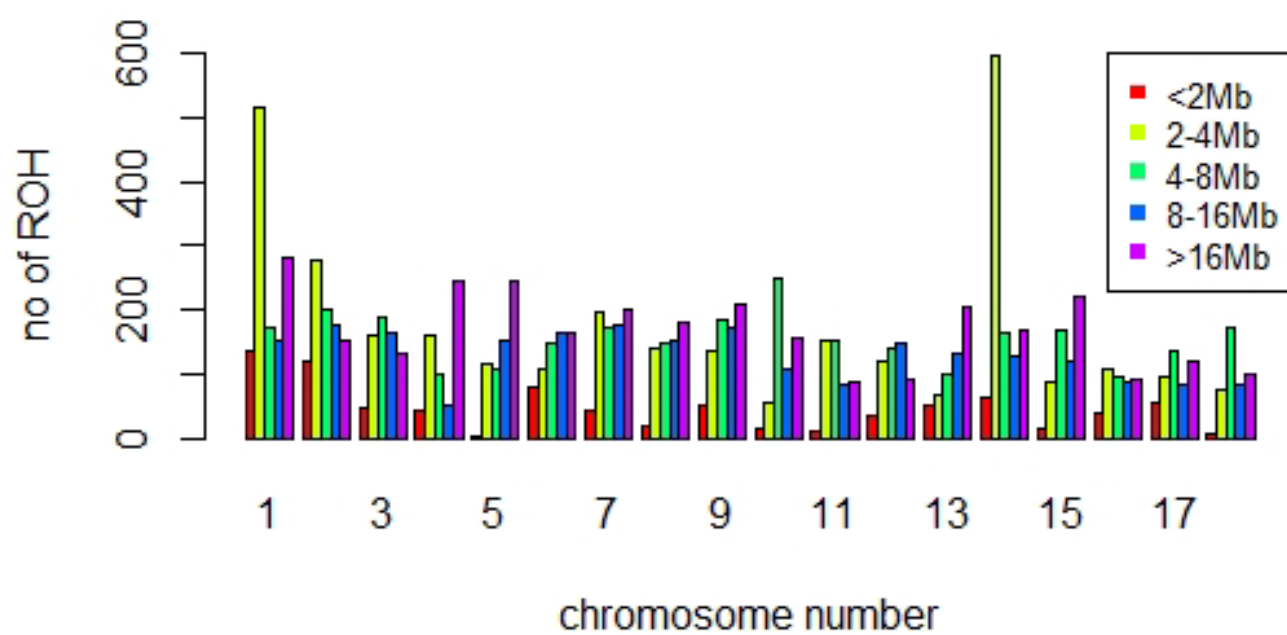

**Figure S5.** Distribution of the ROH per chromosome and length in Nero Lucano pig.



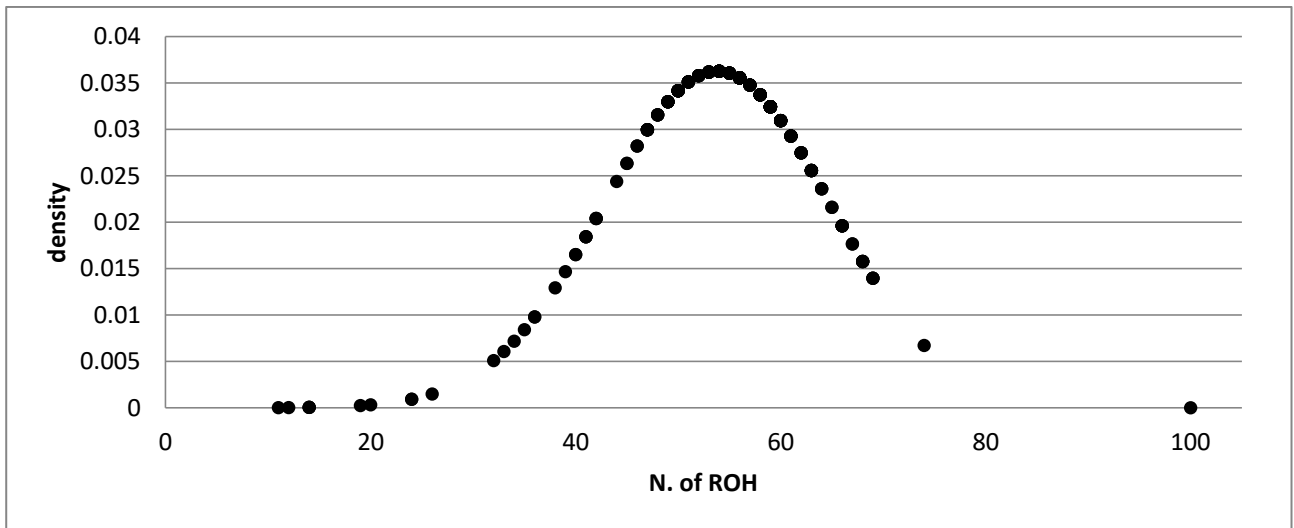

**Figure S6.** Distribution of the ROH in the Nero Lucano pig population.

**Table S4.** Distribution of the ROH present in more than 30% of the analyzed Nero Lucano pigs, longer than 500kb, and with at least 20 SNPs.

| SSC | common ROH | the longer (kb) | the most represented (kb) |
|-----|------------|-----------------|---------------------------|
| 1   | 18         | 2908.297 (111)  | 756.477 (116)             |
| 2   | 17         | 2334.882 (75)   | 861.384 (195)             |
| 3   | 0          | —               | —                         |
| 4   | 19         | 2676.525 (79)   | 1507.925 (205)            |
| 5   | 12         | 2790.301 (79)   | 2149.325 (210)            |
| 6   | 10         | 2901.328 (73)   | 1379.01 (105)             |
| 7   | 17         | 2810.644 (139)  | 1762.86 (149)             |
| 8   | 11         | 3894.132 (130)  | 773.528 (143)             |
| 9   | 10         | 1985.692 (155)  | 1290.151 (165)            |
| 10  | 6          | 1324.492 (99)   | 1059.501 (149)            |
| 11  | 3          | 1232.266 (110)  |                           |
| 12  | 4          | 1391.44 (72)    | 748.116 (125)             |
| 13  | 8          | 5555.072 (164)  | 2251.264 (166)            |
| 14  | 15         | 1872.548 (79)   | 1856.209 (214)            |
| 15  | 12         | 5749.139 (93)   | 2666.392 (201)            |
| 16  | 3          | 1030.413 (106)  |                           |
| 17  | 3          | 1033.309 (90)   | 765.889 (99)              |
| 18  | 3          | 1235.672 (101)  | 751.602 (197)             |

In parenthesis the number of pigs sharing the ROH

**Table S5.** Genes located in the most represented ROH per each chromosome of the Nero Lucano pig (NCBI Release 106, Chromosome Assembly Sscrofa 11.1). N=number of pigs sharing that ROH.

| SSC     | 1                                  | 1                                                | 2               | 4                                                                                                                                                                                                                                                                    | 5                                                                                                                                                                                                                                                                                                                                                                                                                                                                                                                                                                              | 6                                                                                                                                                                                                                               | 7                                                                                                                                                                                                                                                                                                                                      | 8                                                                                                                                                                                                           | 9                                                                                                                                                                              | 10                                                                                                                                          | 11                                                                                                                   | 12                                                                                                          | 13                                                                                             | 14                                                                                   | 15                                                                           | 16                                                                 | 17                                                       | 18                                               |
|---------|------------------------------------|--------------------------------------------------|-----------------|----------------------------------------------------------------------------------------------------------------------------------------------------------------------------------------------------------------------------------------------------------------------|--------------------------------------------------------------------------------------------------------------------------------------------------------------------------------------------------------------------------------------------------------------------------------------------------------------------------------------------------------------------------------------------------------------------------------------------------------------------------------------------------------------------------------------------------------------------------------|---------------------------------------------------------------------------------------------------------------------------------------------------------------------------------------------------------------------------------|----------------------------------------------------------------------------------------------------------------------------------------------------------------------------------------------------------------------------------------------------------------------------------------------------------------------------------------|-------------------------------------------------------------------------------------------------------------------------------------------------------------------------------------------------------------|--------------------------------------------------------------------------------------------------------------------------------------------------------------------------------|---------------------------------------------------------------------------------------------------------------------------------------------|----------------------------------------------------------------------------------------------------------------------|-------------------------------------------------------------------------------------------------------------|------------------------------------------------------------------------------------------------|--------------------------------------------------------------------------------------|------------------------------------------------------------------------------|--------------------------------------------------------------------|----------------------------------------------------------|--------------------------------------------------|
| From bp | 74,697,399                         | 75,598,401                                       | 138,402,311     | 110,313,400                                                                                                                                                                                                                                                          | 77,860,263                                                                                                                                                                                                                                                                                                                                                                                                                                                                                                                                                                     | 88,560,724                                                                                                                                                                                                                      | 28,115,845                                                                                                                                                                                                                                                                                                                             | 133,299,160                                                                                                                                                                                                 | 37,152,122                                                                                                                                                                     | 51,270,214                                                                                                                                  | 1,019,966                                                                                                            | 43,427,847                                                                                                  | 48,679,827                                                                                     | 46,176,964                                                                           | 24,689,916                                                                   | 72,355,816                                                         | 11,383,256                                               | 3,021,252                                        |
| To bp   | 75,386,437                         | 76,354,878                                       | 139,263,695     | 111,821,325                                                                                                                                                                                                                                                          | 80,009,588                                                                                                                                                                                                                                                                                                                                                                                                                                                                                                                                                                     | 89,939,734                                                                                                                                                                                                                      | 29,878,705                                                                                                                                                                                                                                                                                                                             | 134,072,688                                                                                                                                                                                                 | 38,442,273                                                                                                                                                                     | 52,329,715                                                                                                                                  | 2,252,232                                                                                                            | 44,175,963                                                                                                  | 51,136,679                                                                                     | 48,033,173                                                                           | 27,356,308                                                                   | 73,387,229                                                         | 12,149,145                                               | 3,772,854                                        |
| N       | 116                                | 116                                              | 195             | 205                                                                                                                                                                                                                                                                  | 210                                                                                                                                                                                                                                                                                                                                                                                                                                                                                                                                                                            | 105                                                                                                                                                                                                                             | 149                                                                                                                                                                                                                                                                                                                                    | 143                                                                                                                                                                                                         | 165                                                                                                                                                                            | 149                                                                                                                                         | 110                                                                                                                  | 125                                                                                                         | 166                                                                                            | 214                                                                                  | 201                                                                          | 106                                                                | 99                                                       | 197                                              |
| GENES   | FOXO3<br>ARMC2<br>SESN1<br>CEP57L1 | AK9<br>FIG4<br>GPR6<br>WASF1<br>CDC40<br>METTL24 | TRPC7<br>SPOCK1 | EPS8L3<br>GSTM3<br>AMPD2<br>GNAT2<br>GNAI3<br>AMIGO1<br>ATXN7L2<br>SYPL2<br>PSMA5<br>SORT1<br>MYBPHL<br>PSRC1<br>CELSR2<br>SARS<br>KIAA1324<br>TMEM167B<br>TAF13<br>WDR47<br>CLCC1<br>GPSM2<br>AKNAD1<br>STXBP3<br>FNDC7<br>PRPF38B<br>HENMT1<br>FAM102B<br>SLC25A24 | RPAP3<br>ENDOU<br>RAPGEF3<br>SLC48A1<br>HDAC7<br>VDR<br>TMEM106C<br>COL2A1<br>TMEM234<br>SEN1<br>EIF3I<br>RPS18<br>PFKM<br>FAM167B<br>ASB8<br>LCK<br>HDAC1<br>CCDC184<br>ZNF641<br>MARCKSL1<br>LALBA<br>FAM229A<br>TAPBP<br>KANS12<br>BSDC1<br>ZBTB22<br>APPL2<br>TSSK3<br>DAXX<br>WASHC4<br>ZBTB8B<br>KIFC1<br>ALDH1L2<br>ZBTB8A<br>PHF1<br>SLC41A2<br>ZBTB8OS<br>CUTA<br>CHST11<br>RBBP4<br>SYNGAP1<br>ZBTB9<br>KIAA1522<br>BAK1<br>YARS<br>ITPR3<br>S100PBP<br>FNDC5<br>HPCA<br>TMEM54<br>RNF19B<br>AK2<br>AZIN2<br>TRIM62<br>ZNF362<br>A3GALT2<br>PHC2<br>ZSCAN20<br>CSMD2 | KHDRBS1<br>PRIM2<br>ARHGAP24<br>WDFY3<br>CDS1<br>DDX10<br>ZC3H12C<br>RDX<br>FDX1<br>OTUD1<br>PTF1A<br>IL17D<br>XPO4<br>EV12A<br>FAM19A1<br>KREMEN1<br>DBI<br>SEMA5A<br>POLB<br>AK9<br>FIG4<br>GPR6<br>WASF1<br>CDC40<br>METTL24 | PRIM2<br>RAB23<br>BAG2<br>ZNF451<br>BEND6<br>DST<br>COL21A1<br>VPS52<br>RPS18<br>B3GALT4<br>WDR46<br>PFDN6<br>RGL2<br>TAPBP<br>ZBTB22<br>DAXX<br>KIFC1<br>PHF1<br>CUTA<br>SYNGAP1<br>ZBTB9<br>BAK1<br>ITPR3<br>S100PBP<br>FNDC5<br>HPCA<br>TMEM54<br>RNF19B<br>AK2<br>AZIN2<br>TRIM62<br>ZNF362<br>A3GALT2<br>PHC2<br>ZSCAN20<br>CSMD2 | ARHGAP24<br>WDFY3<br>CDS1<br>DDX10<br>ZC3H12C<br>RDX<br>FDX1<br>OTUD1<br>PTF1A<br>IL17D<br>XPO4<br>EV12A<br>FAM19A1<br>KREMEN1<br>DBI<br>SEMA5A<br>POLB<br>AK9<br>FIG4<br>GPR6<br>WASF1<br>CDC40<br>METTL24 | DDX10<br>ZC3H12C<br>RDX<br>FDX1<br>OTUD1<br>PTF1A<br>IL17D<br>XPO4<br>EV12A<br>FAM19A1<br>KREMEN1<br>DBI<br>SEMA5A<br>POLB<br>AK9<br>FIG4<br>GPR6<br>WASF1<br>CDC40<br>METTL24 | OTUD1<br>PTF1A<br>IL17D<br>XPO4<br>EV12A<br>FAM19A1<br>KREMEN1<br>DBI<br>SEMA5A<br>POLB<br>AK9<br>FIG4<br>GPR6<br>WASF1<br>CDC40<br>METTL24 | IFT88<br>RAB11FIP4<br>SUCLG2<br>ZNR3<br>STEAP3<br>TAS2R1<br>POLB<br>AK9<br>FIG4<br>GPR6<br>WASF1<br>CDC40<br>METTL24 | RAB11FIP4<br>SUCLG2<br>ZNR3<br>STEAP3<br>TAS2R1<br>POLB<br>AK9<br>FIG4<br>GPR6<br>WASF1<br>CDC40<br>METTL24 | SUCLG2<br>ZNR3<br>STEAP3<br>TAS2R1<br>POLB<br>AK9<br>FIG4<br>GPR6<br>WASF1<br>CDC40<br>METTL24 | ZNR3<br>STEAP3<br>TAS2R1<br>POLB<br>AK9<br>FIG4<br>GPR6<br>WASF1<br>CDC40<br>METTL24 | STEAP3<br>TAS2R1<br>POLB<br>AK9<br>FIG4<br>GPR6<br>WASF1<br>CDC40<br>METTL24 | TAS2R1<br>POLB<br>AK9<br>FIG4<br>GPR6<br>WASF1<br>CDC40<br>METTL24 | POLB<br>AK9<br>FIG4<br>GPR6<br>WASF1<br>CDC40<br>METTL24 | AK9<br>FIG4<br>GPR6<br>WASF1<br>CDC40<br>METTL24 |
